# Supplementary material for: Therapeutic Potential of (−)-Agelamide D, a Diterpene Alkaloid from the Marine Sponge Agelas sp., as a Natural Radiosensitizer in Hepatocellular Carcinoma Models
Source: MDPI journal article supplement (doi:10.3390/md18100500), 2020-09-29
Supplement: s1 [file s1]

# Therapeutic Potential of (–)-Agelamide D, a Diterpene Alkaloid from the Marine Sponge *Agelas* sp., as a Natural Radiosensitizer in Hepatocellular Carcinoma Models

Changhoon Choi <sup>1</sup>, Yeonwoo Cho <sup>2,3</sup>, Arang Son <sup>1</sup>, Sung-Won Shin <sup>1,4</sup>, Yeon-Ju Lee <sup>2,3,\*</sup>, and Hee Chul Park <sup>1,4,\*</sup>

<sup>1</sup> Department of Radiation Oncology, Samsung Medical Center, Seoul 06351, Korea; chchoi93@gmail.com (C.C.); onlyshohow@naver.com (A.S.); camuserik@gmail.com (S.-W.S.)

<sup>2</sup> Marine Natural Products Chemistry Laboratory, Korea Institute of Ocean Science and Technology, 385 Haeyangro, Busan 49111, Korea; yeonwoo@kiost.ac.kr

<sup>3</sup> Department of Applied Ocean Science, University of Science and Technology, Daejeon 34113, Korea

<sup>4</sup> Department of Radiation Oncology, Sungkyunkwan University School of Medicine, Seoul 06351, Korea

\* Correspondence: yjlee@kiost.ac.kr (Y.-J.L.); hee.ro.park@samsung.com (H.C.P.)

## Tables of Contents

**Table S1.** Serum biochemical parameters in two groups of mice that received radiation therapy (RT) or RT plus (–)-agelamide

**Figure S1.** Underwater (A) and *in situ* (B) photographs of *Agelas* sp. used in this study

**Figure S2.** Bioassay-guided isolation of compounds **1** and **2** from *Agelas* sp.

**Figure S3.** Enhancement of apoptosis by combined treatment with fractions from *Agelas* extract and radiation

**Figure S4.** <sup>1</sup>H and <sup>13</sup>C NMR spectra (600 MHz and 150 MHz, methanol-*d*<sub>3</sub>) of compound **2**

**Figure S5.** COSY and HSQC spectra of compound **2**

**Figure S6.** HMBC spectra of compound **2**

**Figure S7.** Selective COSY and HMBC correlations for compound **2**

**Table S1.** Serum biochemical parameters in two groups of mice that received radiation therapy (RT) or RT plus (–)-agelamide

| Parameters               | Unit  | RT           | RT plus (–)-agelamide |
|--------------------------|-------|--------------|-----------------------|
| Aspartate transaminase   | U/L   | 81.0 ± 26.3  | 81.3 ± 7.1            |
| Alanine transaminase     | U/L   | 28.7 ± 2.1   | 26.0 ± 4.4            |
| Alkaline phosphatase     | U/L   | 99.3 ± 20.2  | 91.0 ± 11.5           |
| Total protein            | g/dL  | 4.8 ± 0.5    | 4.9 ± 0.2             |
| Albumin                  | g/dL  | 2.6 ± 0.3    | 2.7 ± 0.2             |
| Total bilirubin          | mg/dL | 0.1          | 0.1                   |
| Blood urea nitrogen      | mg/dL | 22.2 ± 4.0   | 25.6 ± 1.8            |
| Creatine                 | mg/dL | 0.5 ± 0.1    | 0.5                   |
| Glucose                  | mg/dL | 247.7 ± 74.7 | 224.7 ± 64.1          |
| Cholesterol              | mg/dL | 69.0 ± 3.6   | 74.7 ± 7.6            |
| Triglyceride             | mg/dL | 65.0 ± 4.6   | 70.3 ± 14.6           |
| Phosphorus               | U/L   | 7.4 ± 1.6    | 5.6 ± 1.0             |
| Ca <sup>2+</sup>         | mg/dl | 8.8 ± 0.7    | 8.5 ± 0.3             |
| Creatine phosphokinaset† | U/L   | 232.1 ± 69.0 | 485.4 ± 147.3         |
| A/G ratio                |       | 1.2 ± 0.2    | 1.3 ± 0.3             |

†Statistically not significant

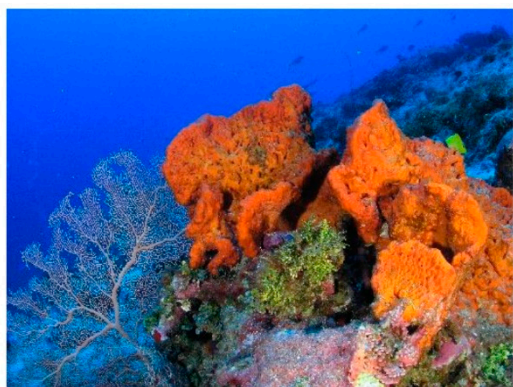

**A**

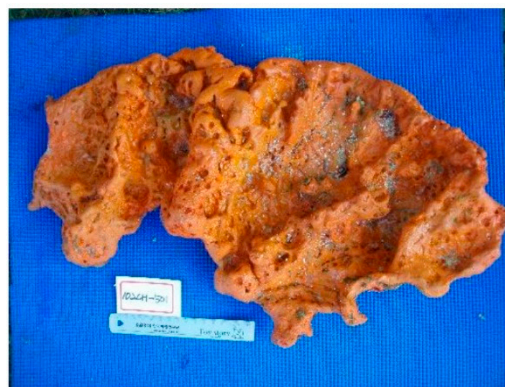

**B**

**Figure S1.** Underwater (A) and *in situ* (B) photographs of *Agelas* sp. used in this study

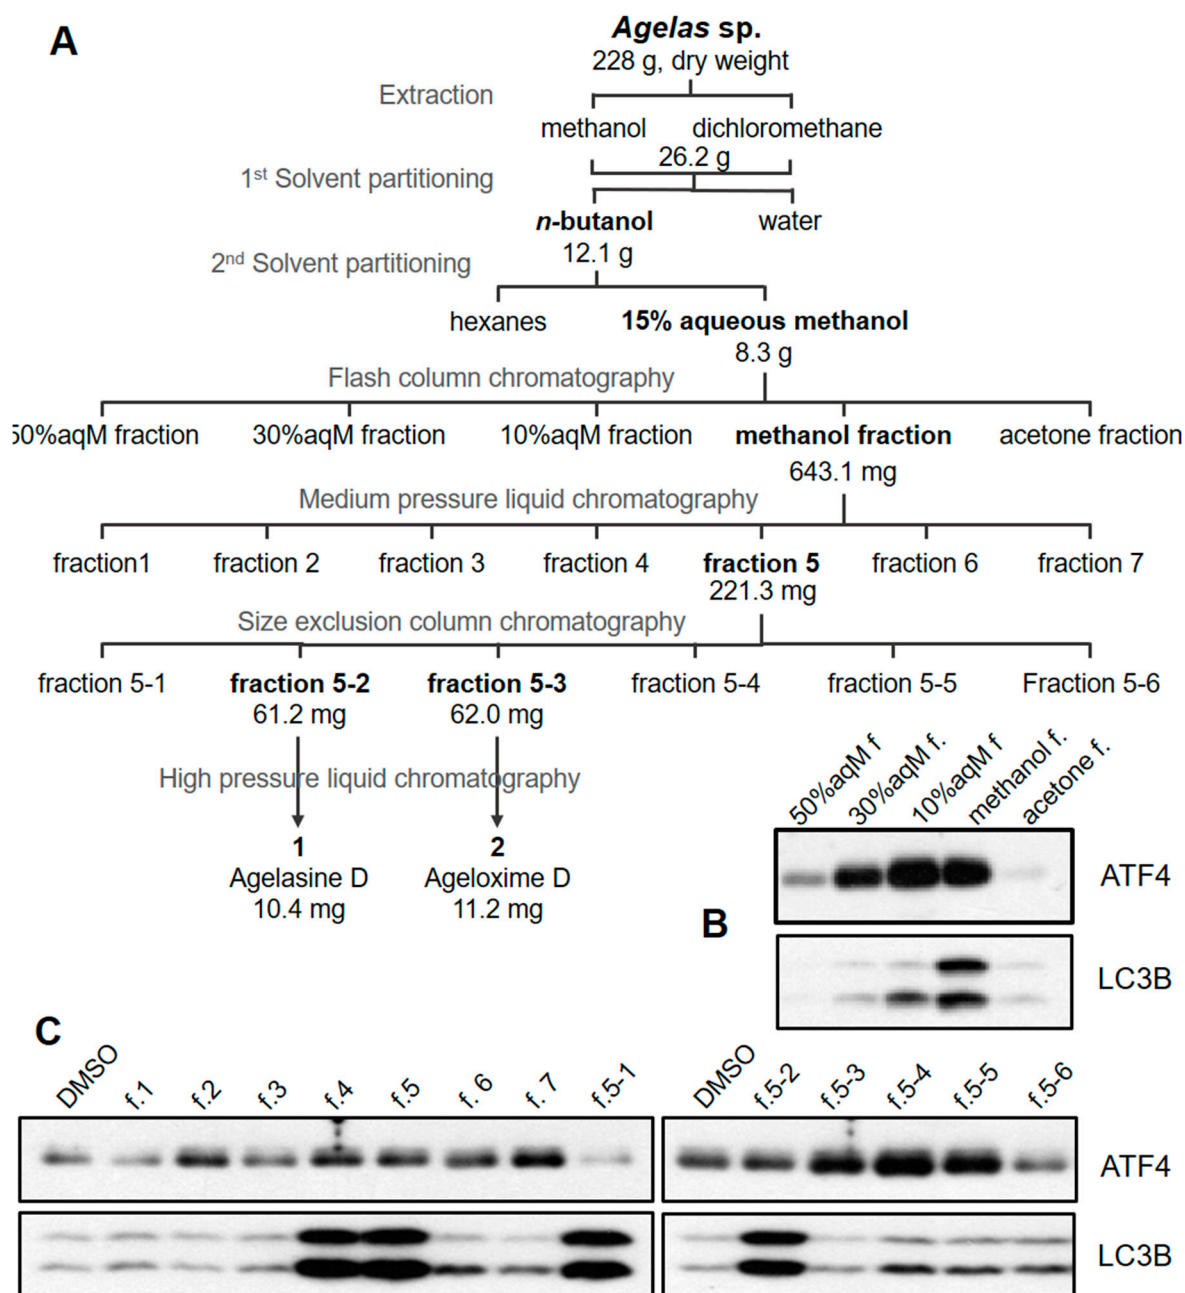

**Figure S2.** Bioassay-guided isolation of compounds 1 and 2 from *Agelas* sp. **A**, Extraction and isolation scheme for compounds 1 and 2 from *Agelas* sp. **B**, Levels of ATF4 and LC3B induced by the fractions obtained through flash column chromatography. **C**, Levels of ATF4 and LC3B induced by the fractions obtained through medium pressure liquid chromatography (MPLC) (fractions 1–7) and size exclusion column chromatography (fractions 5.1–5.6).

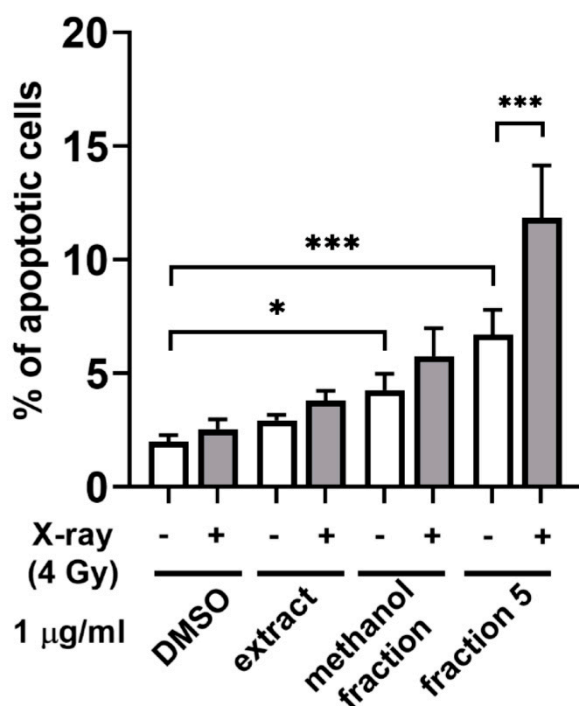

**Figure S3.** Enhancement of apoptosis by combined treatment with fractions from *Agelas* extract and radiation. Hep3B cells were pre-treated with the same amount (1 µg/mL) of the samples from each purification step for 3 h, followed by irradiation with 4 Gy of X-rays. After 48 h, the samples were collected, and the apoptotic cell population was analyzed through flow cytometry with Annexin V/propidium iodide co-staining. Data are mean ± standard deviation (SD) from two independent experiments ( $n = 6$ ). \*  $p < 0.05$ ; \*\*\*  $p < 0.001$ .

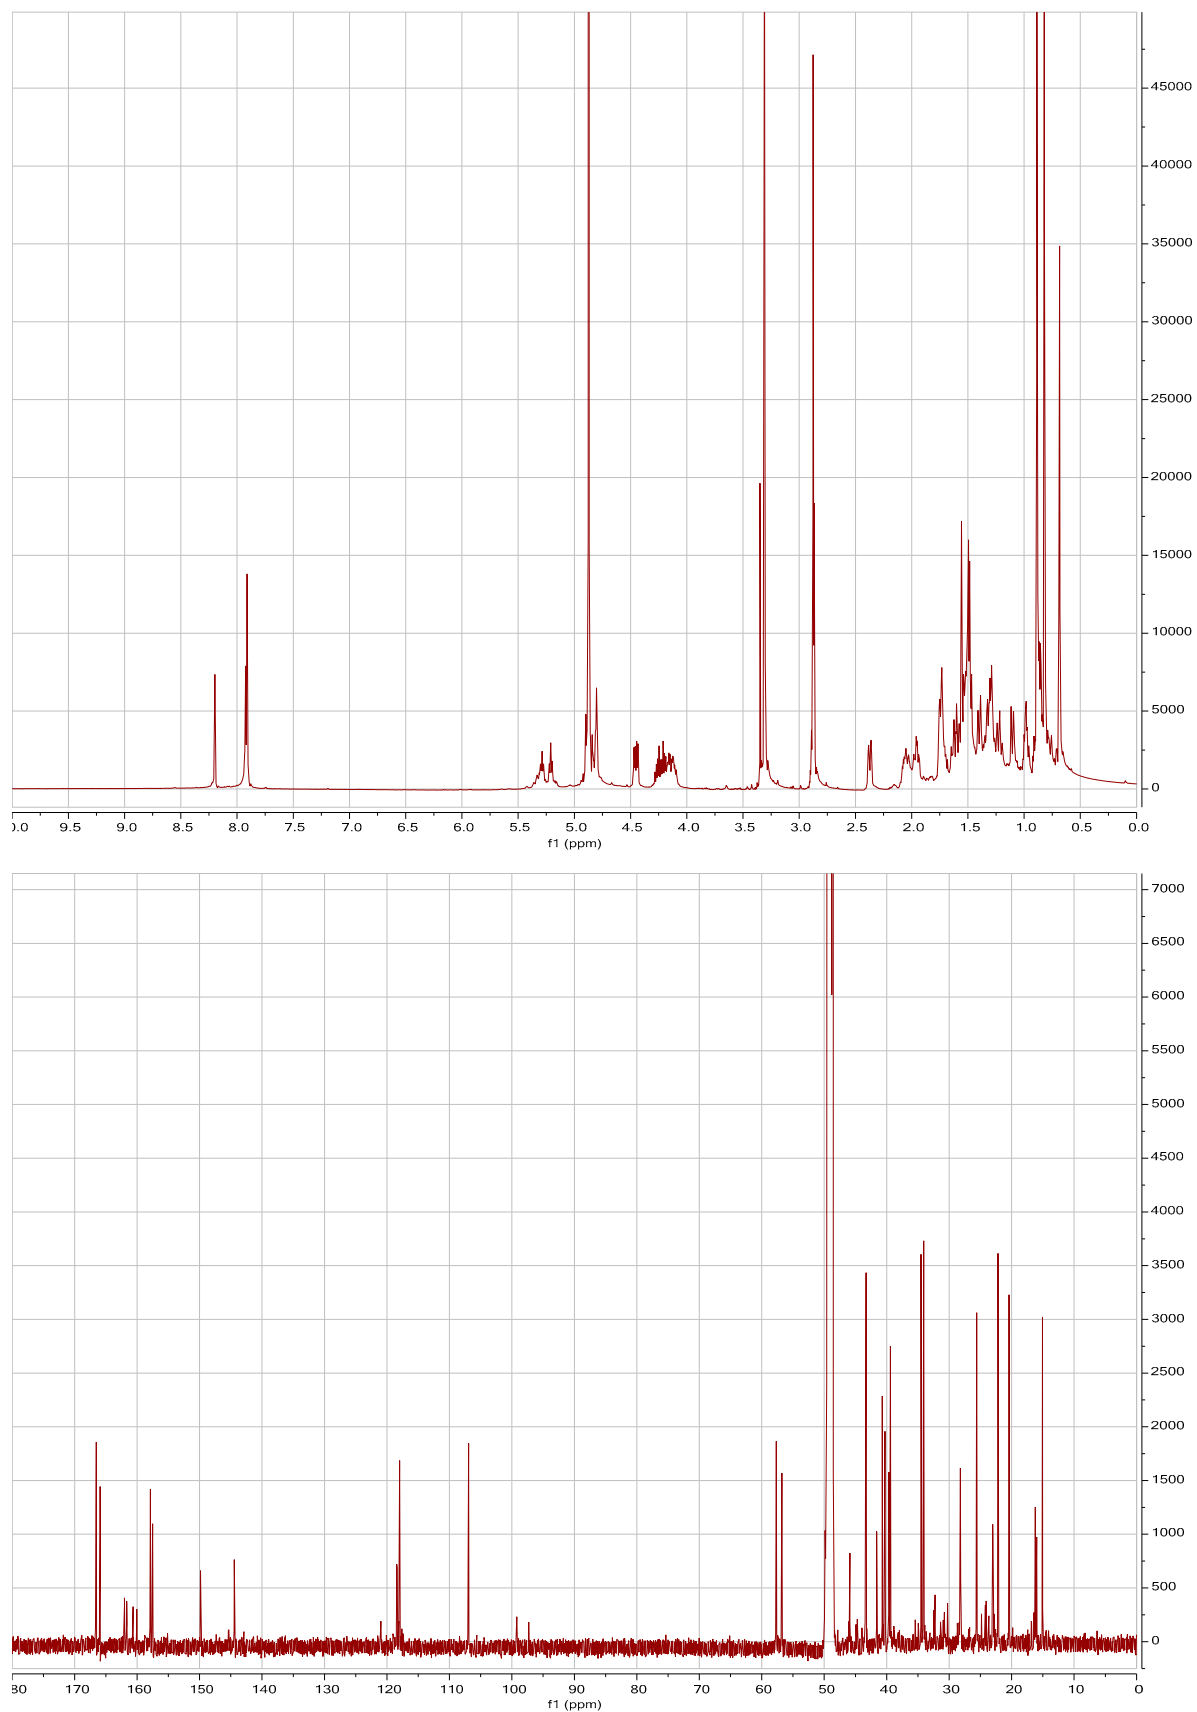

**Figure S4.**  $^1\text{H}$  and  $^{13}\text{C}$  NMR spectra (600 MHz and 150 MHz, methanol- $d_4$ ) of compound 2

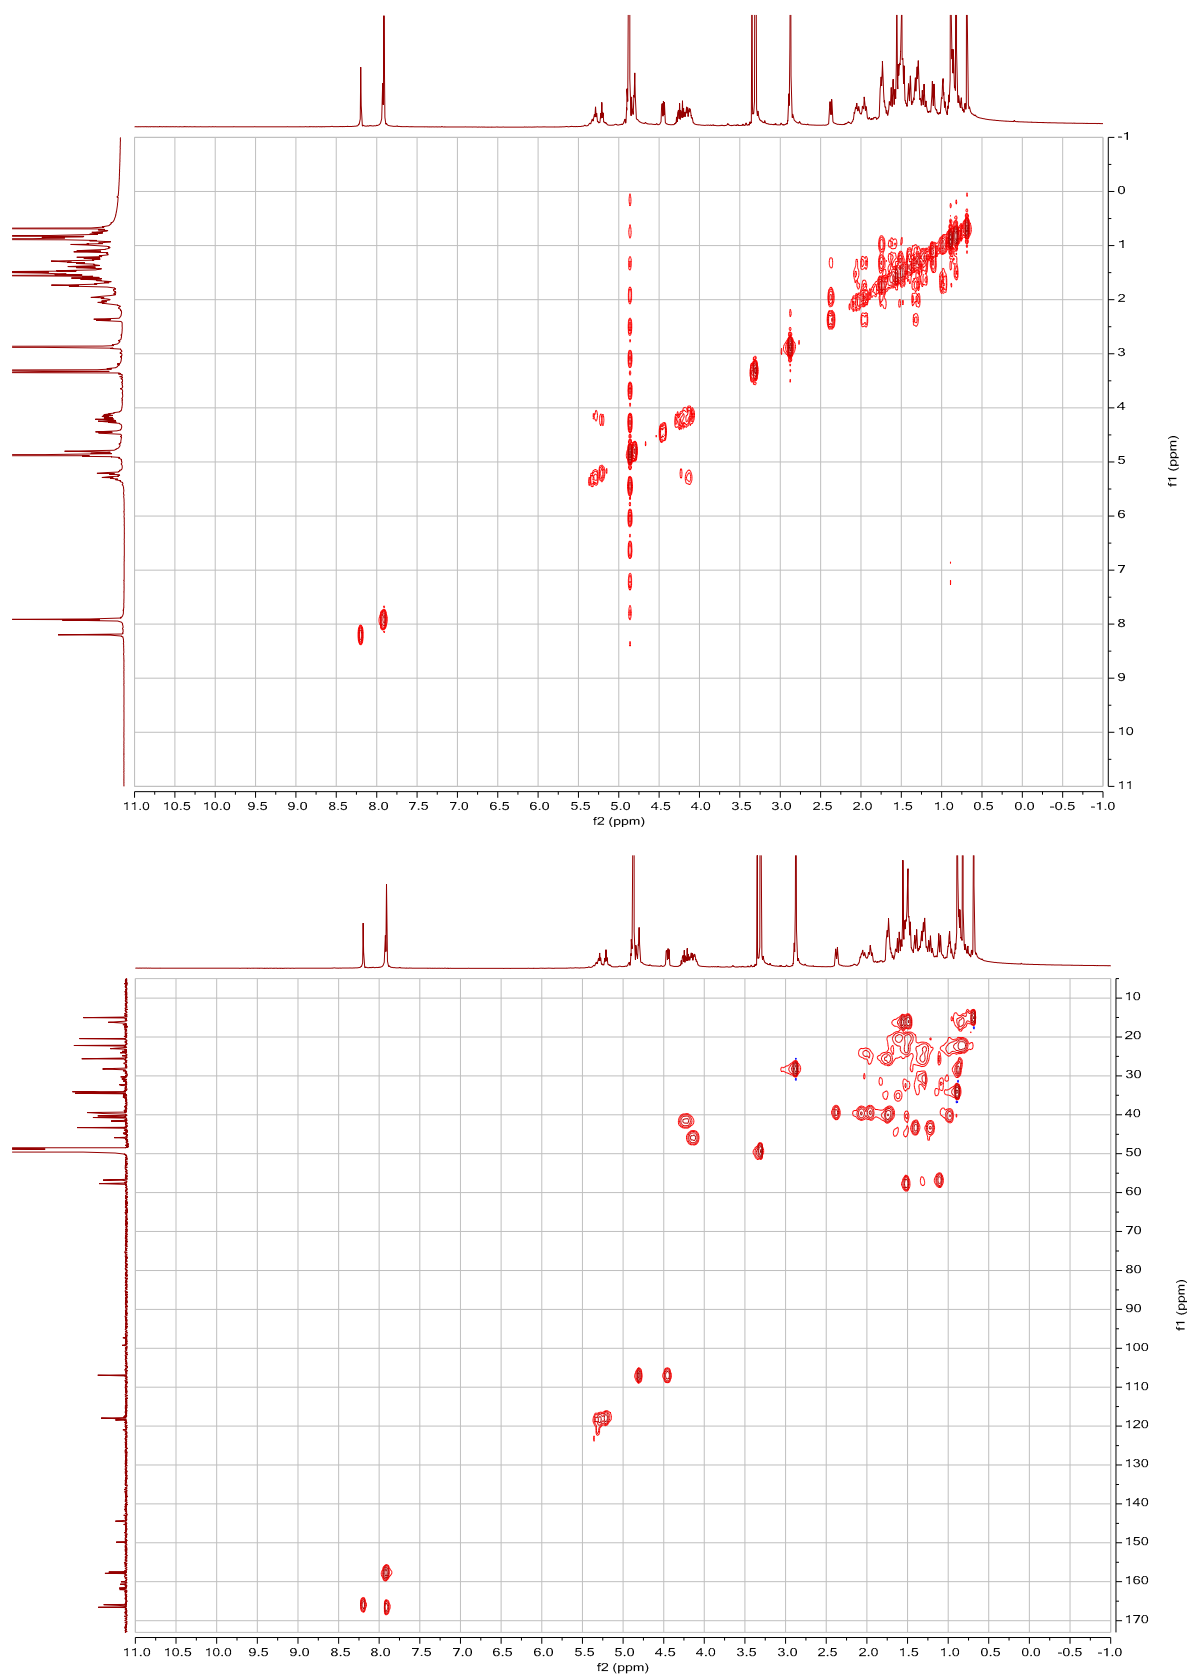

**Figure S5.** COSY and HSQC spectra of compound 2

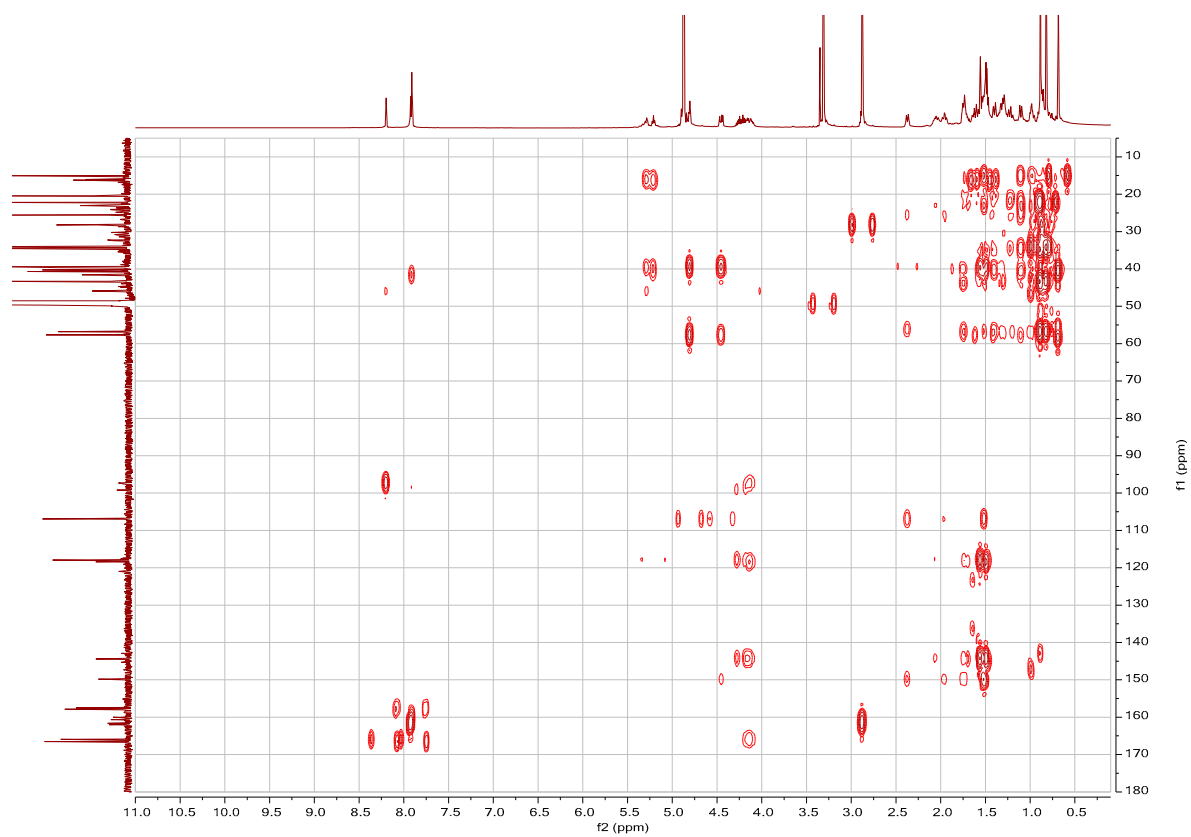

Figure S6. HMBC spectra of compound 2

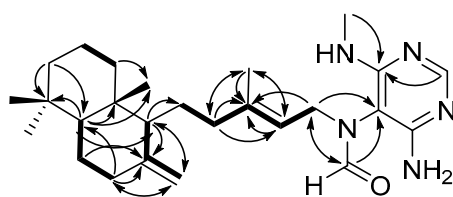

Figure S7. Selective COSY and HMBC correlations for compound 2
